# Supplementary material for: Identification of a plasma signature of psychotic disorder in children and adolescents from the Avon Longitudinal Study of Parents and Children (ALSPAC) cohort
Source: PubMed Central journal article supplement (PMC5639252; doi:10.1038/tp.2017.211), 2017-09-26
Supplement: tp2017211x2.pdf [file tp2017211x2.pdf]

**PCs age 11**

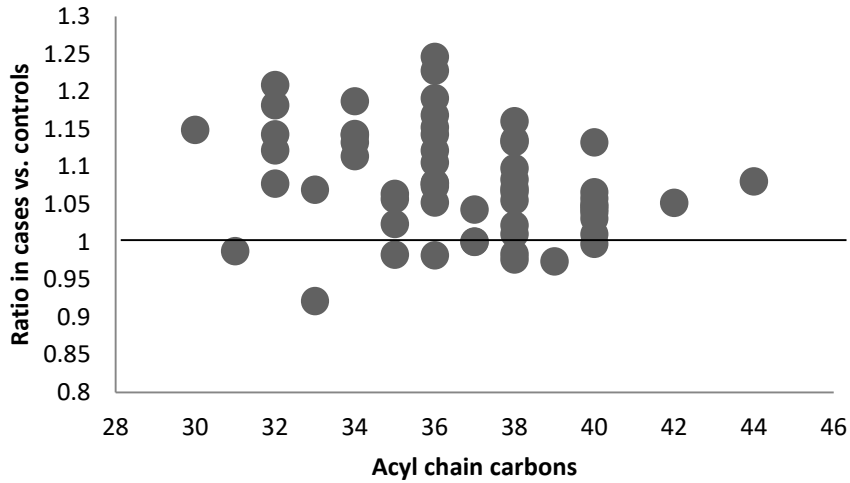

**PCs age 18**

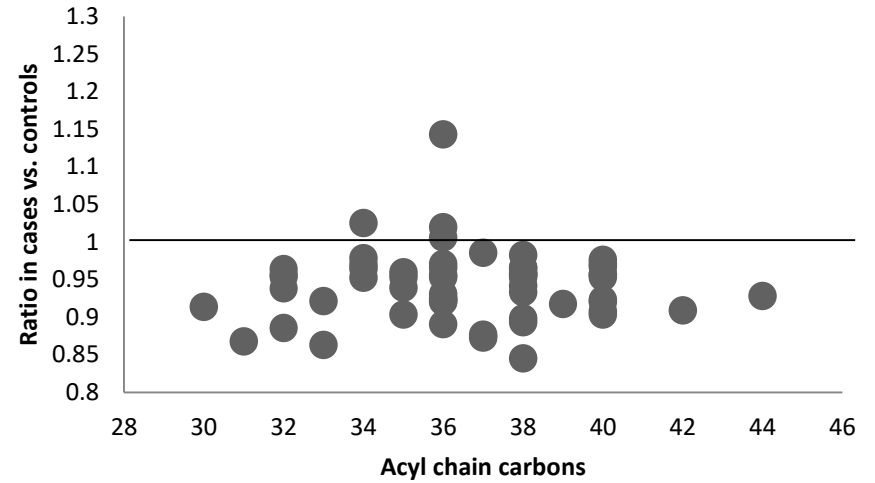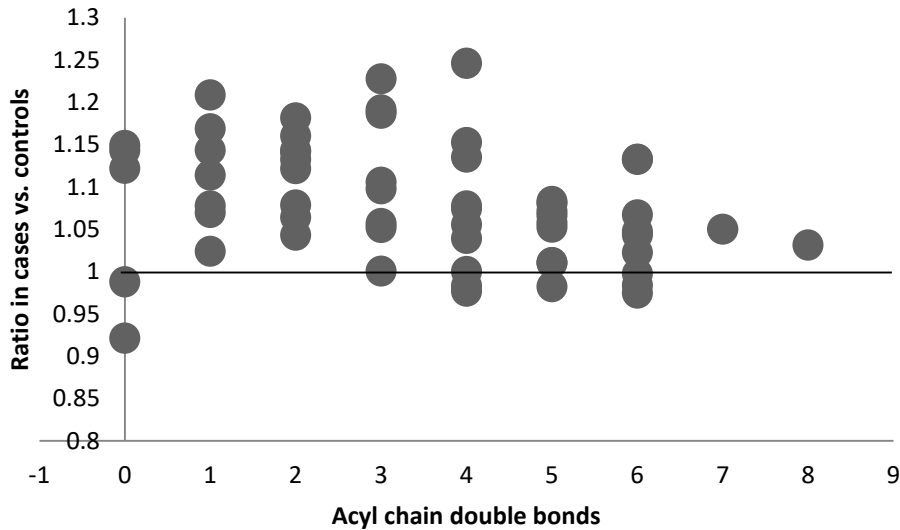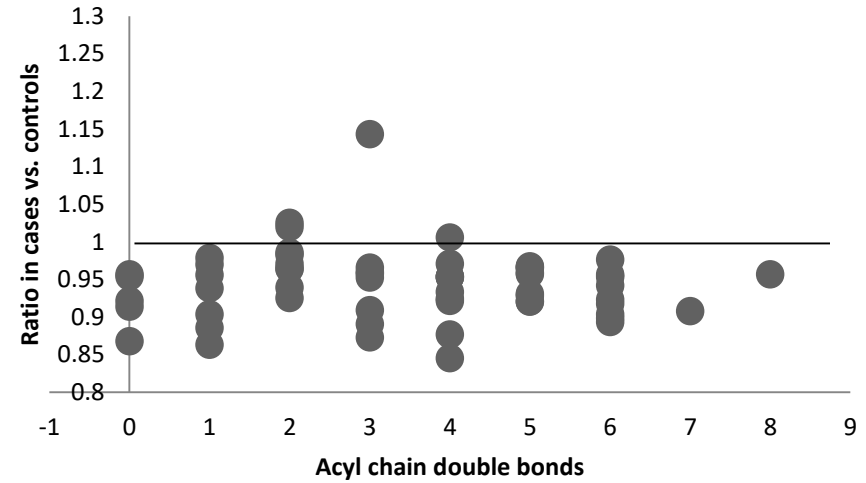

PCs: Phosphatidylcholines

Supplementary Figure 1: Relationship between PD and acyl chain content for PCs.

TGs age 11

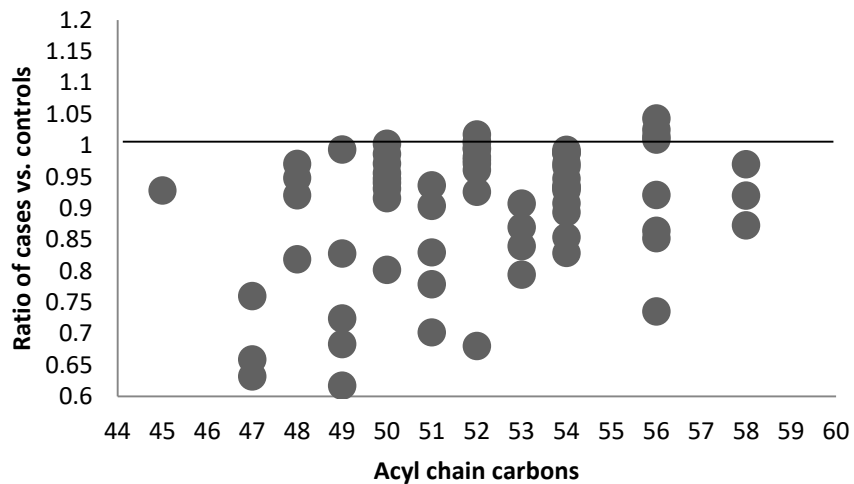

TGs age 18

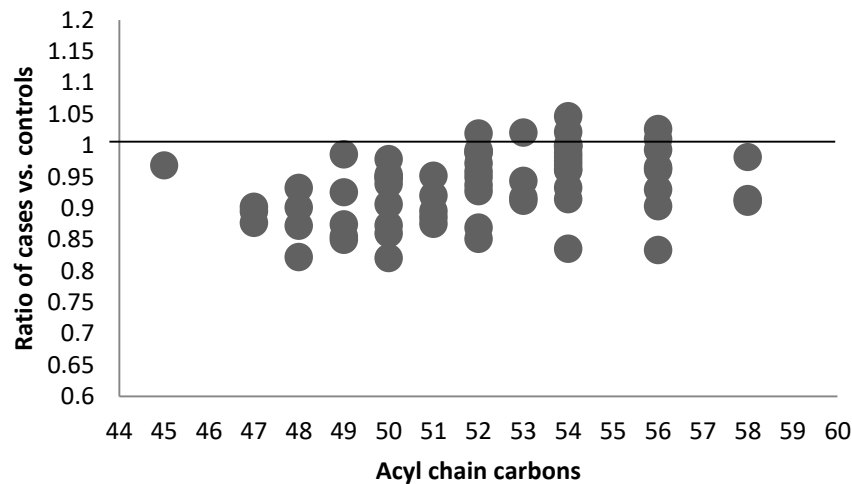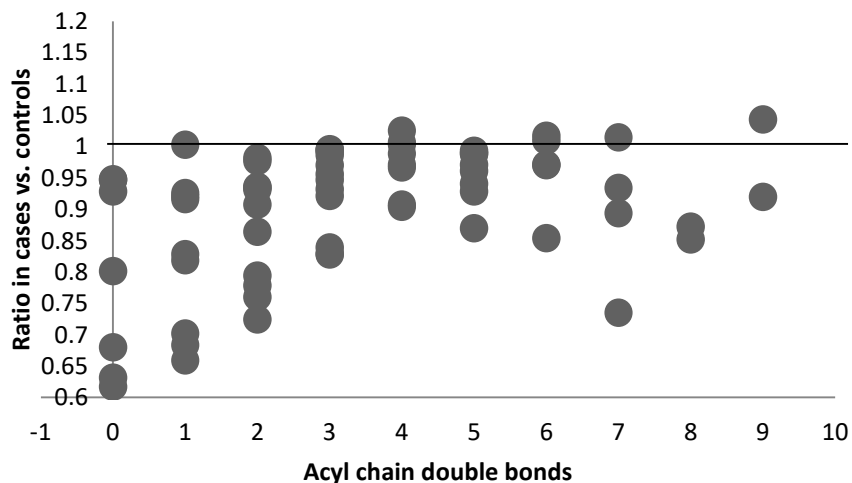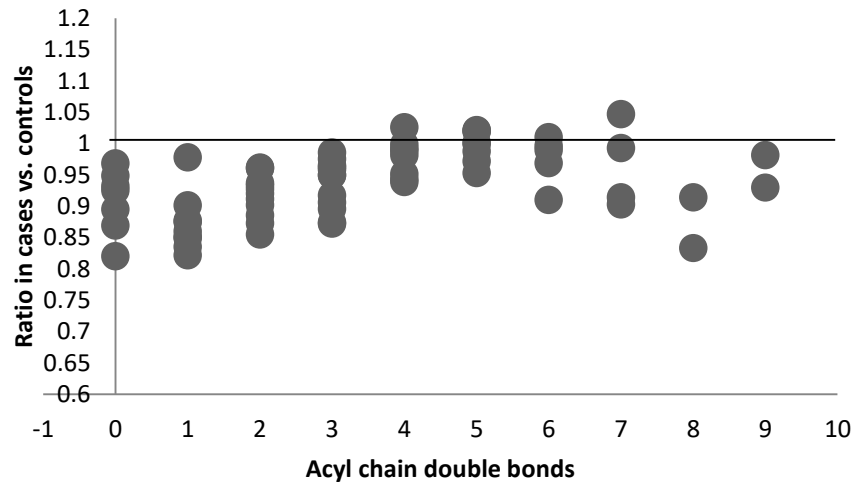

TAGs: Triacylglycerides

Supplementary Figure 2: Relationship between PD and acyl chain content for TAGs.

### CEs age 11

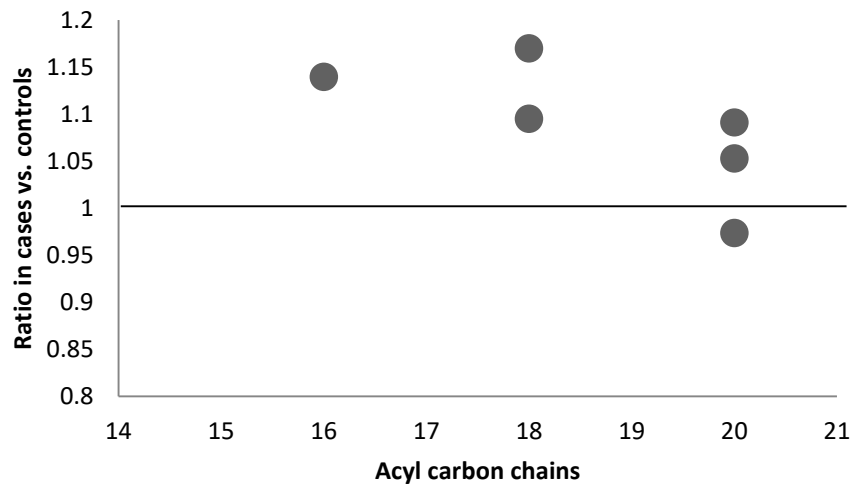

### CEs age 18

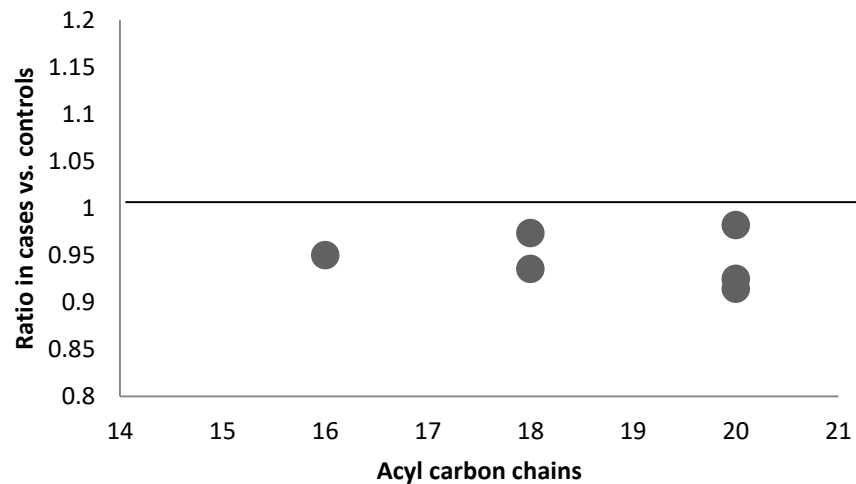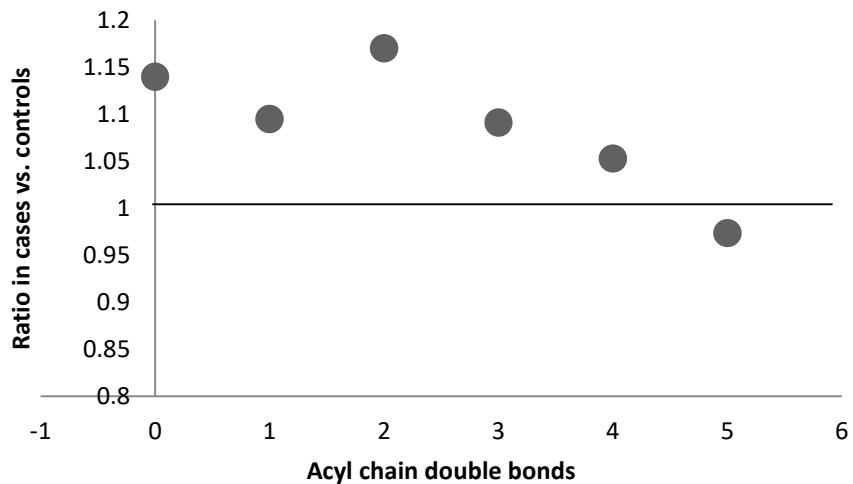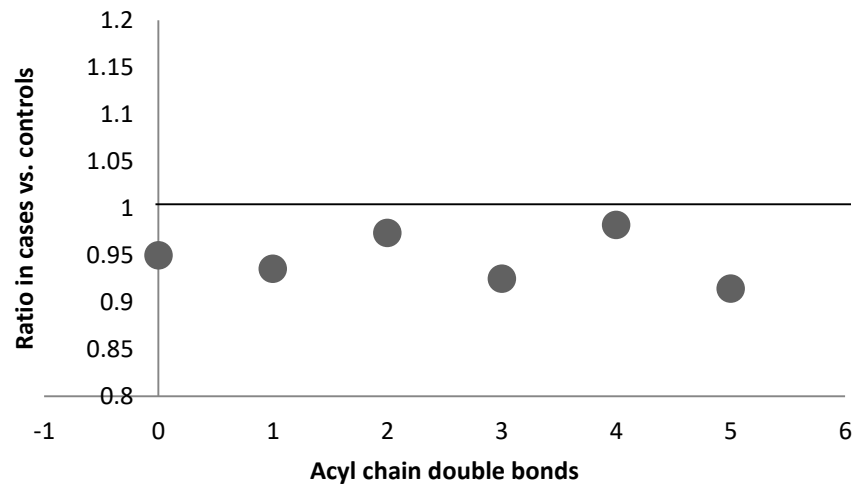

CEs: Cholesterol esters

Supplementary Figure 3: Relationship between PD and acyl chain content for CEs.
